# Supplementary material for: Detecting critical PM 2.5 emission sources and their contributions to a heavy haze episode in Beijing, China by using an adjoint model
Source: Copernicus journal article supplement (doi:10.5194/acp-2016-911), 2016-11-25
Supplement: Supplementary file 1 [file acp-2016-911-supplement.pdf]

## Detecting critical PM<sub>2.5</sub> emission sources and their contributions to a heavy haze episode in Beijing, China by using an adjoint model

S. X. Zhai et al.

Correspondence to: Xingqin An (anxq@camsma.cn) and Tianliang Zhao (tlzhao@nuist.edu.cn)

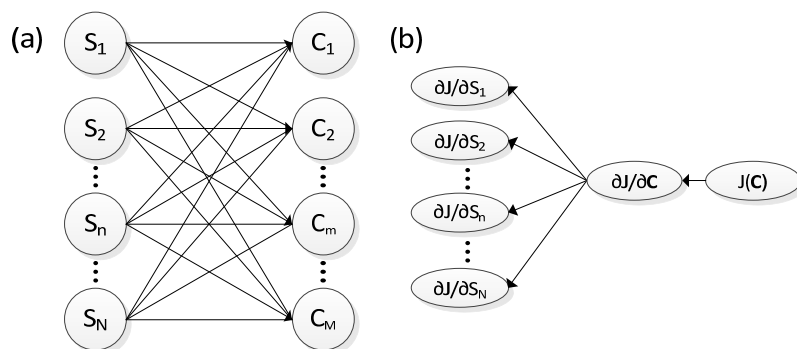

Figure S1. Schematic diagrams of the atmospheric chemistry forward (a) and adjoint (b) models.  $S_1, S_2, \dots, S_n, \dots, S_N$  are emission sources of different sectors, or of different species, at different locations etc., and  $S$  is the emission vector;  $C_1, C_2, \dots, C_m, \dots, C_M$  are pollutant concentrations at different sites, or of different species, and  $C$  is the concentration vector.

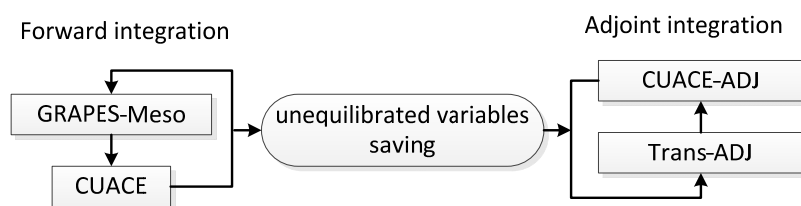

Figure S2. Operational processes of the GRAPES-CUACE aerosol adjoint
